# Supplementary material for: Distinct fecal and oral microbiota composition in human type 1 diabetes, an observational study
Source: PubMed Central journal article supplement (PMC5718513; doi:10.1371/journal.pone.0188475), 2017-12-06

A - T1D

p-value

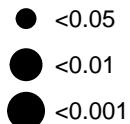

r

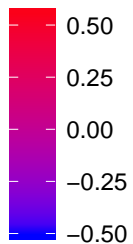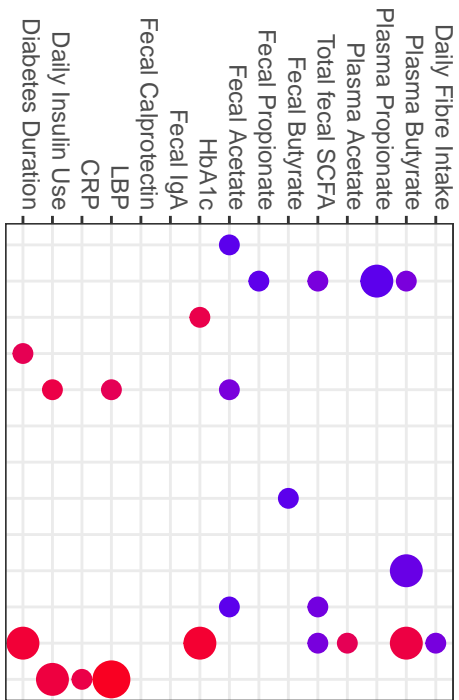

B - HC

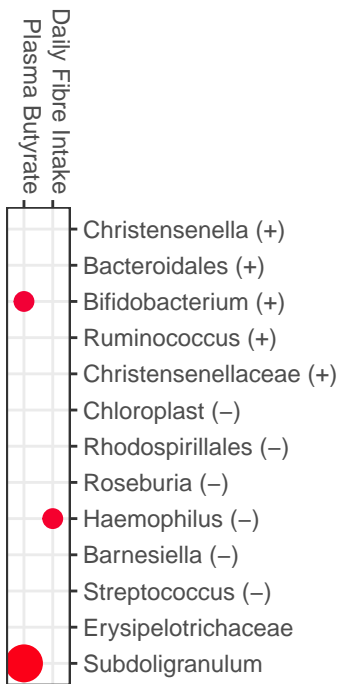

Supplement: pone.0188475.s002.pdf [file pone.0188475.s002.pdf]
